# Supplementary material
Source: PubMed Central journal article supplement (PMC10082416)
Supplement: jama-e235927-s001.pdf [file jama-e235927-s001.pdf]

## **Data Sharing Statement**

### **Data**

**Data available:** Yes

**Data types:** Data (not involving human participants)

**How to access data:** NGS data files will be submitted to a public repository. Also, bacterial isolates will be shared with labs upon request (MTA required).

**When available:** With publication

### **Supporting Documents**

**Document types:** None

### **Additional Information**

**Who can access the data:** anyone requesting the data (strains available upon request and with MTA). Patient data only in aggregated form.

**Types of analyses:** any purpose

**Mechanisms of data availability:** under MTA
